# Supplementary material for: Temporal changes in DNA methylation and RNA expression in a small song bird: within- and between-tissue comparisons
Source: BMC Genomics. 2021 Jan 7;22:36. doi: 10.1186/s12864-020-07329-9 (PMC7792223; doi:10.1186/s12864-020-07329-9)
Supplement: Supplementary file 39 — Additional file 39: Table S20. Number of sites in RBC changing in methylation in different gene regions between time point 1 and 2 within genes associated with either Q1 and Q3 or Q2 and Q4 in liver. [file 12864_2020_7329_MOESM39_ESM.xlsx]

## Sheet: Sheet1
Additional file 39: Table S20. Number of sites in RBC changing in methylation in different gene regions between time point 1 and 2 within genes associated with either Q1 and Q3 or Q2 and Q4 in liver.
Gene Id	Gene region	No. of sites within quadrant Q1 or Q3	No. of sites within quadrant Q2 or Q4	Total no. Sites
CDC42SE1	promoter region	0	2	2
CHAC2	promoter region	1	0	1
LOC107199038	promoter region	0	2	2
PIGC	promoter region	1	0	1
SLC35E4	promoter region	2	0	2
Total	promoter region	4	4	8
Gene Id	Gene region	No. of sites within quadrant Q1 or Q3	No. of sites within quadrant Q2 or Q4	Total no. Sites
BAG3	gene body	1	0	1
CDC42SE1	gene body	0	2	2
CHAC2	gene body	0	1	1
CNPY2	gene body	1	0	1
FAM160B2	gene body	0	1	1
HMBOX1	gene body	0	1	1
LOC107199038	gene body	0	1	1
LOC107199348	gene body	0	1	1
LOC107203409	gene body	0	3	3
LOC107207019	gene body	0	1	1
LOC107210561	gene body	0	1	1
NFIC	gene body	0	2	2
RTN4RL1	gene body	0	1	1
TCN2	gene body	2	0	2
TESC	gene body	1	0	1
TM6SF2	gene body	0	2	2
TMEM132C	gene body	1	1	2
TRIM35	gene body	0	2	2
FAM49A	gene body	1	1	2
IL13RA2	gene body	0	1	1
LAPTM5	gene body	1	1	2
Total	gene body	8	23	31
Gene Id	Gene region	No. of sites within quadrant Q1 or Q3	No. of sites within quadrant Q2 or Q4	Total no. Sites
AOC1	10k upstream region	0	1	1
CDC42SE1	10k upstream region	0	2	2
CHAC2	10k upstream region	1	0	1
CORO1C	10k upstream region	0	1	1
LOC107199038	10k upstream region	0	2	2
MRPS12	10k upstream region	0	1	1
NUDT17	10k upstream region	0	2	2
PIGC	10k upstream region	1	0	1
SEMA4A	10k upstream region	1	0	1
SLC35E4	10k upstream region	2	0	2
TEPSIN	10k upstream region	1	1	2
TRIM35	10k upstream region	2	10	12
Total	10k upstream region	8	20	28
Gene Id	Gene region	No. of sites within quadrant Q1 or Q3	No. of sites within quadrant Q2 or Q4	Total no. Sites
AOC1	10k downstream region	0	2	2
BTG2	10k downstream region	0	1	1
CD80	10k downstream region	0	1	1
CORO1C	10k downstream region	1	0	1
FAM160B2	10k downstream region	1	1	2
FAM63A	10k downstream region	0	1	1
MYCL	10k downstream region	1	0	1
NR1D1	10k downstream region	1	0	1
NUDT17	10k downstream region	1	1	2
PAOX	10k downstream region	0	1	1
SSH2	10k downstream region	2	0	2
TRIM35	10k downstream region	0	2	2
Total	10k downstream region	7	10	17
